# Supplementary material
Source: HighWire-hosted journal article supplement (https://ijssurgery.com/content/8612)
Supplement: inline-supplementary-material-1 [file inline-supplementary-material-1.docx]

**Supplemental Table 1. Inclusion and Exclusion Criteria.**

| Inclusion Criteria (Subjects who met the following inclusion criteria were enrolled in this study): |
| --- |
| 1. Subject must be 18 years of age (≥ 18 years) or older at the time of consent. 2. Subject must be a candidate for lumbar fusion study. The surgical approach is at the physician’s discretion. 3. Subject must require lumbar arthrodesis at 1-4 contiguous levels (L1-S1) and 1-2 contiguous levels for an interbody approach. 4. Subject must have been unresponsive to conservative care for at least 6 months prior to fusion surgery. 5. A minimum of 50% Trinity Elite must be used for each lumbar fusion: the Trinity Elite may be augmented with up to 50% local bone (autograft) or cancellous bone chips. 6. Subject must be willing and able to sign an informed consent document. 7. Subject must be willing and able to return for all follow-up visits, agree to participate in postoperative clinical and radiographic evaluations and comply with the required study protocol. |
| Exclusion Criteria (Subjects who met any of the following exclusion criteria were not enrolled in this study): |
| 1. Subject is under 18 years of age (<18) at the time of consent 2. Subject has had prior lumbar spine fusion surgery at a level currently scheduled for surgery. 3. Subject is currently undergoing treatment for malignancy or has undergone treatment for malignancy in the past 5 years (benign skin cancer is permitted) 4. Subject is pregnant or nursing or planning to become pregnant during the two years (24 months) following arthrodesis 5. Subject has an active local or systemic infection or is undergoing adjunctive treatment for local or systemic infection 6. Subject has an allergy to DMSO. 7. Subject has any other condition that, in the opinion of the Investigator, would prohibit the subject from complying with the study protocol. 8. Subject is a prisoner. |
